# Supplementary material for: Atmospheric ammonia variability and link with particulate matter formation: a case study over the Paris area
Source: Copernicus journal article supplement (doi:10.5194/acp-20-577-2020), 2020-01-17
Supplement: Supplementary file 1 [file acp-20-577-2020-supplement.pdf]

Supplement of Atmos. Chem. Phys., 20, 577–596, 2020  
<https://doi.org/10.5194/acp-20-577-2020-supplement>  
© Author(s) 2020. This work is distributed under  
the Creative Commons Attribution 4.0 License.

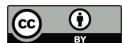

*Supplement of*

## **Atmospheric ammonia variability and link with particulate matter formation: a case study over the Paris area**

**Camille Viatte et al.**

*Correspondence to:* Camille Viatte ([camille.viatte@latmos.ipsl.fr](mailto:camille.viatte@latmos.ipsl.fr))

The copyright of individual parts of the supplement might differ from the CC BY 4.0 License.

- 1 Figure S1: Time series of daily mean  $\text{NH}_3$  concentrations (in molecules/ $\text{cm}^2$ ) derived from IASI
- 2 (upper panel) and  $\text{PM}_{2.5}$  concentration (in  $\mu\text{g}/\text{m}^3$ ) observed over the IdF region between 2013
- 3 and 2016.

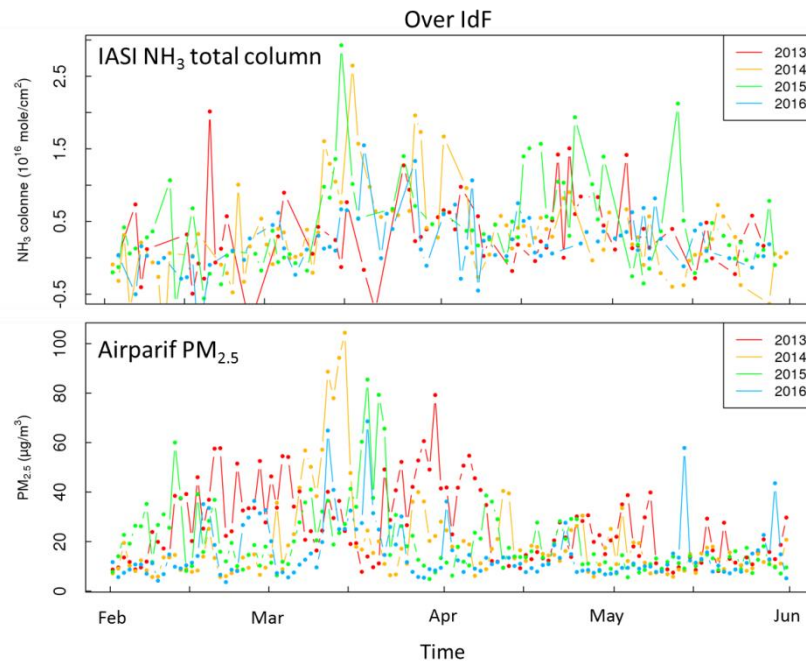

4

5

6 Figure S2: Bar plots of monthly mean  $\text{NH}_3$  total columns derived from IASI (panel a), total  
7 precipitation (panel b) and skin temperature (panel c) derived from ECMWF from March to  
8 August, plotted in different colors for the different years of measurements from 2008 to 2017.

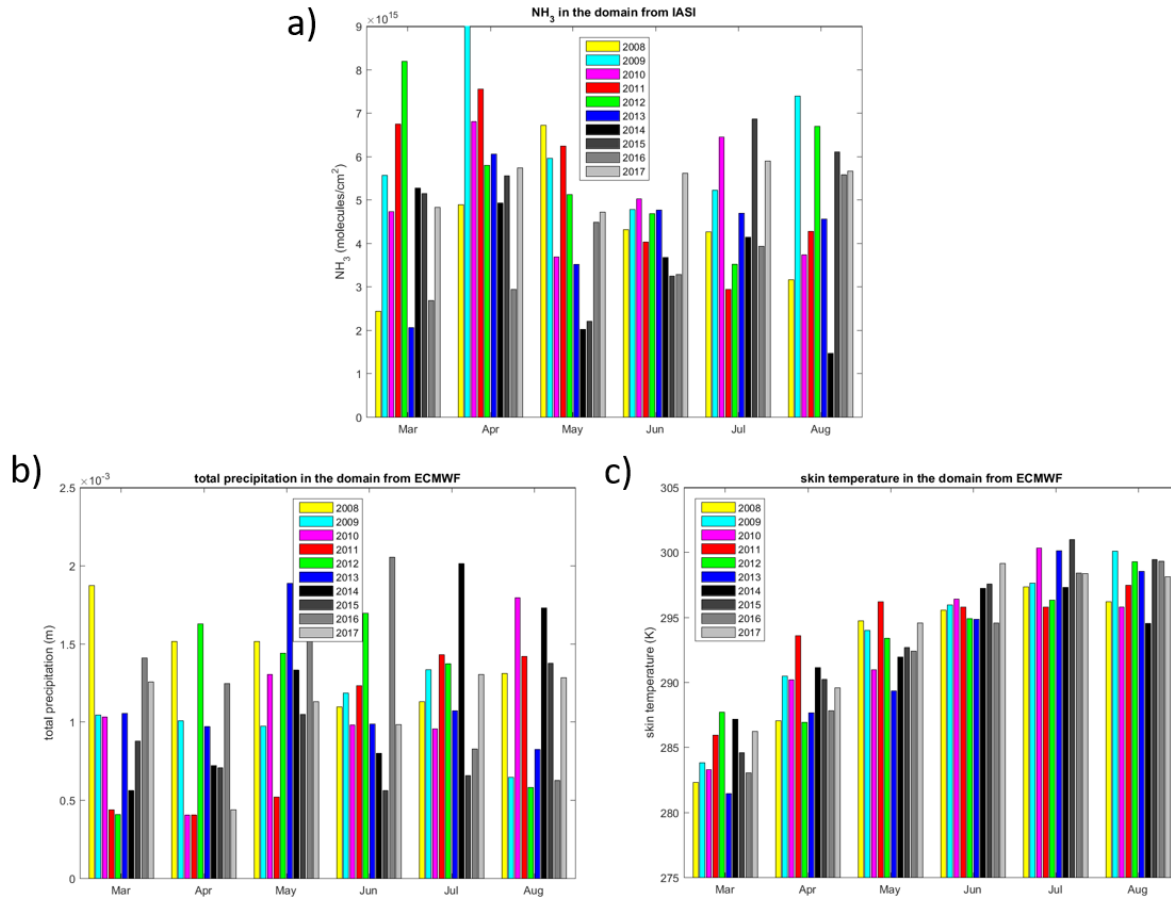

9

10 Figure S3: Difference (model - observations) between the standardized  $\text{NH}_3$  columns derived  
11 from the satellite instruments (IASI - left panels, and CrIS - right panels) and the corresponding  
12  $\text{NH}_3$  columns derived from the CHIMERE model for March-April 2014 and 2015.

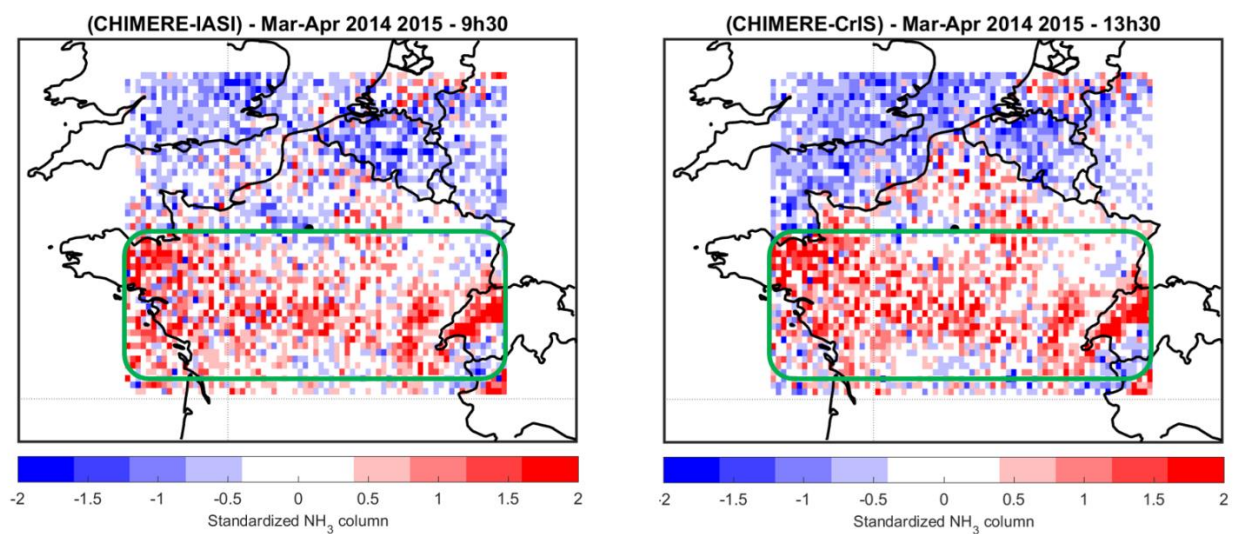

13

14

15 Figure S4: 10-years of monthly mean concentrations of NH<sub>3</sub> total columns derived from IASI in  
16 orange and PM<sub>2.5</sub> derived from the Airparif network in red from 2008 to 2017.

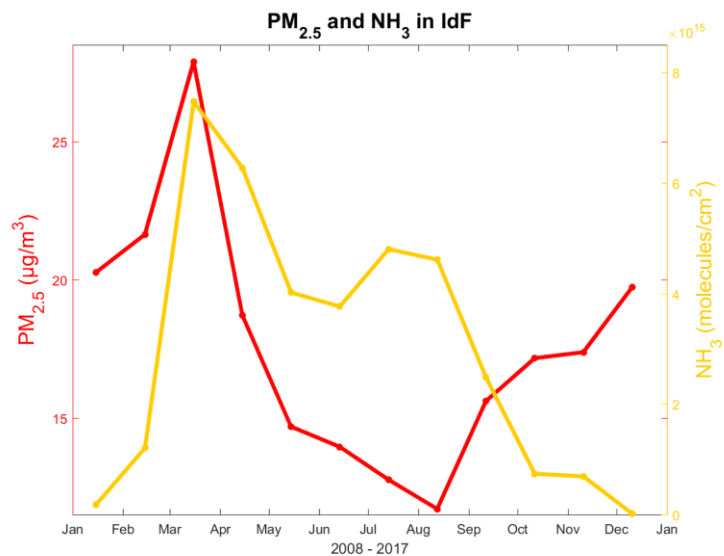

17  
18  
19  
20

21 Figure S5: Cross-correlation analysis of  $\text{NH}_3$  concentrations between the Northeast part of the  
22 domain (over the Netherlands) and the IdF region. Map provided by GOOGLE EARTH  
23 V7.3.2.5776, US Dept. of State Geographer, © Google maps, 2019, Image Landsat/Copernicus,  
24 Data SIO, NOAA, US, Navy, NGA, and GEBCO.

25

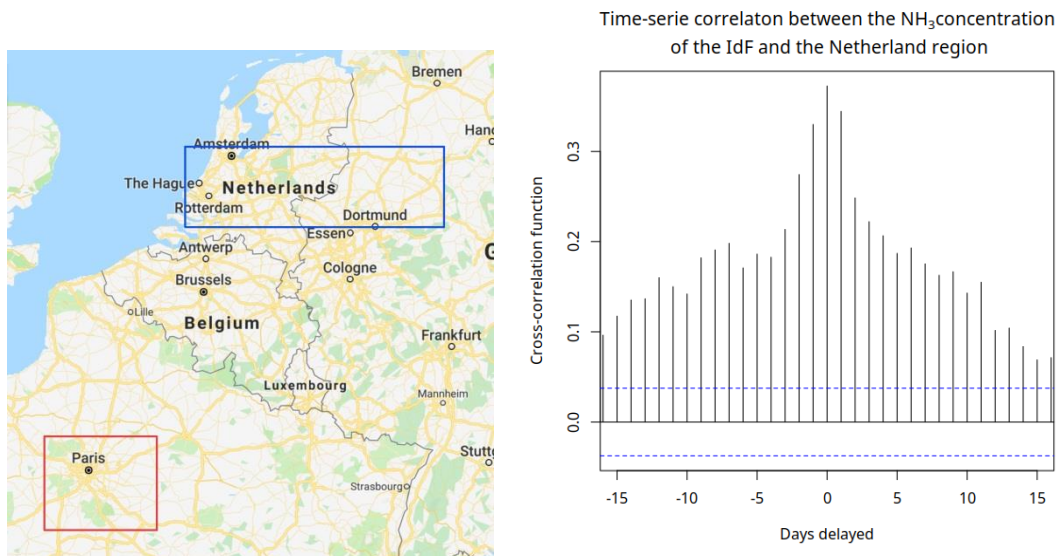

26

27 The cross-correlation function (CCF) is calculated between the daily averaged mean of the IASI  
28  $\text{NH}_3$  columns observed over these two regions (both are average values of available pixels of the  
29 same day). From the CCF plot, we can see that when lag = 0 (i.e. within the same day), the cross-  
30 correlation is maximum with CCF = 0.37, and the CCF is above 0.3 when lag=±1 (i.e. 1 day before  
31 or after) for the whole time period (2008-2016). Therefore, correlation between  $\text{NH}_3$   
32 concentrations over the northeast part of the domain and the IdF region is relatively correlated.  
33 This confirms the result suggested by the back-trajectory analysis in Figure 10. We have also  
34 computed the CCF over these two regions considering months with high  $\text{NH}_3$ : the maximum CCF  
35 between March and August and between March and April are 0.35 and 0.26, respectively.

36 Figure S6: Wind roses of studied cases corresponding to the ensemble (all observations from  
37 2013 to 2016), case A ( $\text{NH}_3$  and  $\text{PM}_{2.5}$  exhibits simultaneous enhancements over Paris) and case  
38 B ( $\text{NH}_3$  and  $\text{PM}_{2.5}$  are enhanced independently).  
39

### Wind Rose of Studied Cases

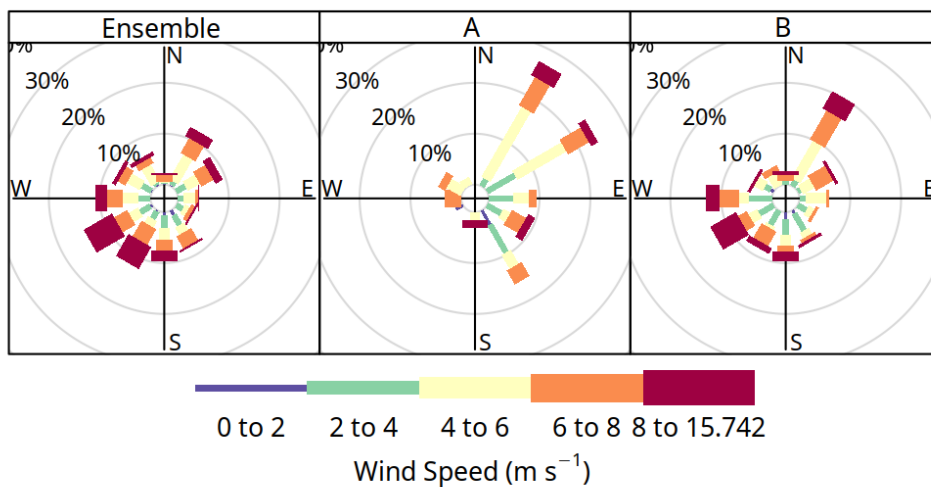

40

41
